# Supplementary material for: NarJ subfamily system specific chaperone diversity and evolution is directed by respiratory enzyme associations
Source: PubMed Central journal article supplement (PMC4464133; doi:10.1186/s12862-015-0412-3), 2015-06-12
Supplement: 12862_2015_412_MOESM3_ESM.pdf [file 12862_2015_412_MOESM3_ESM.pdf]

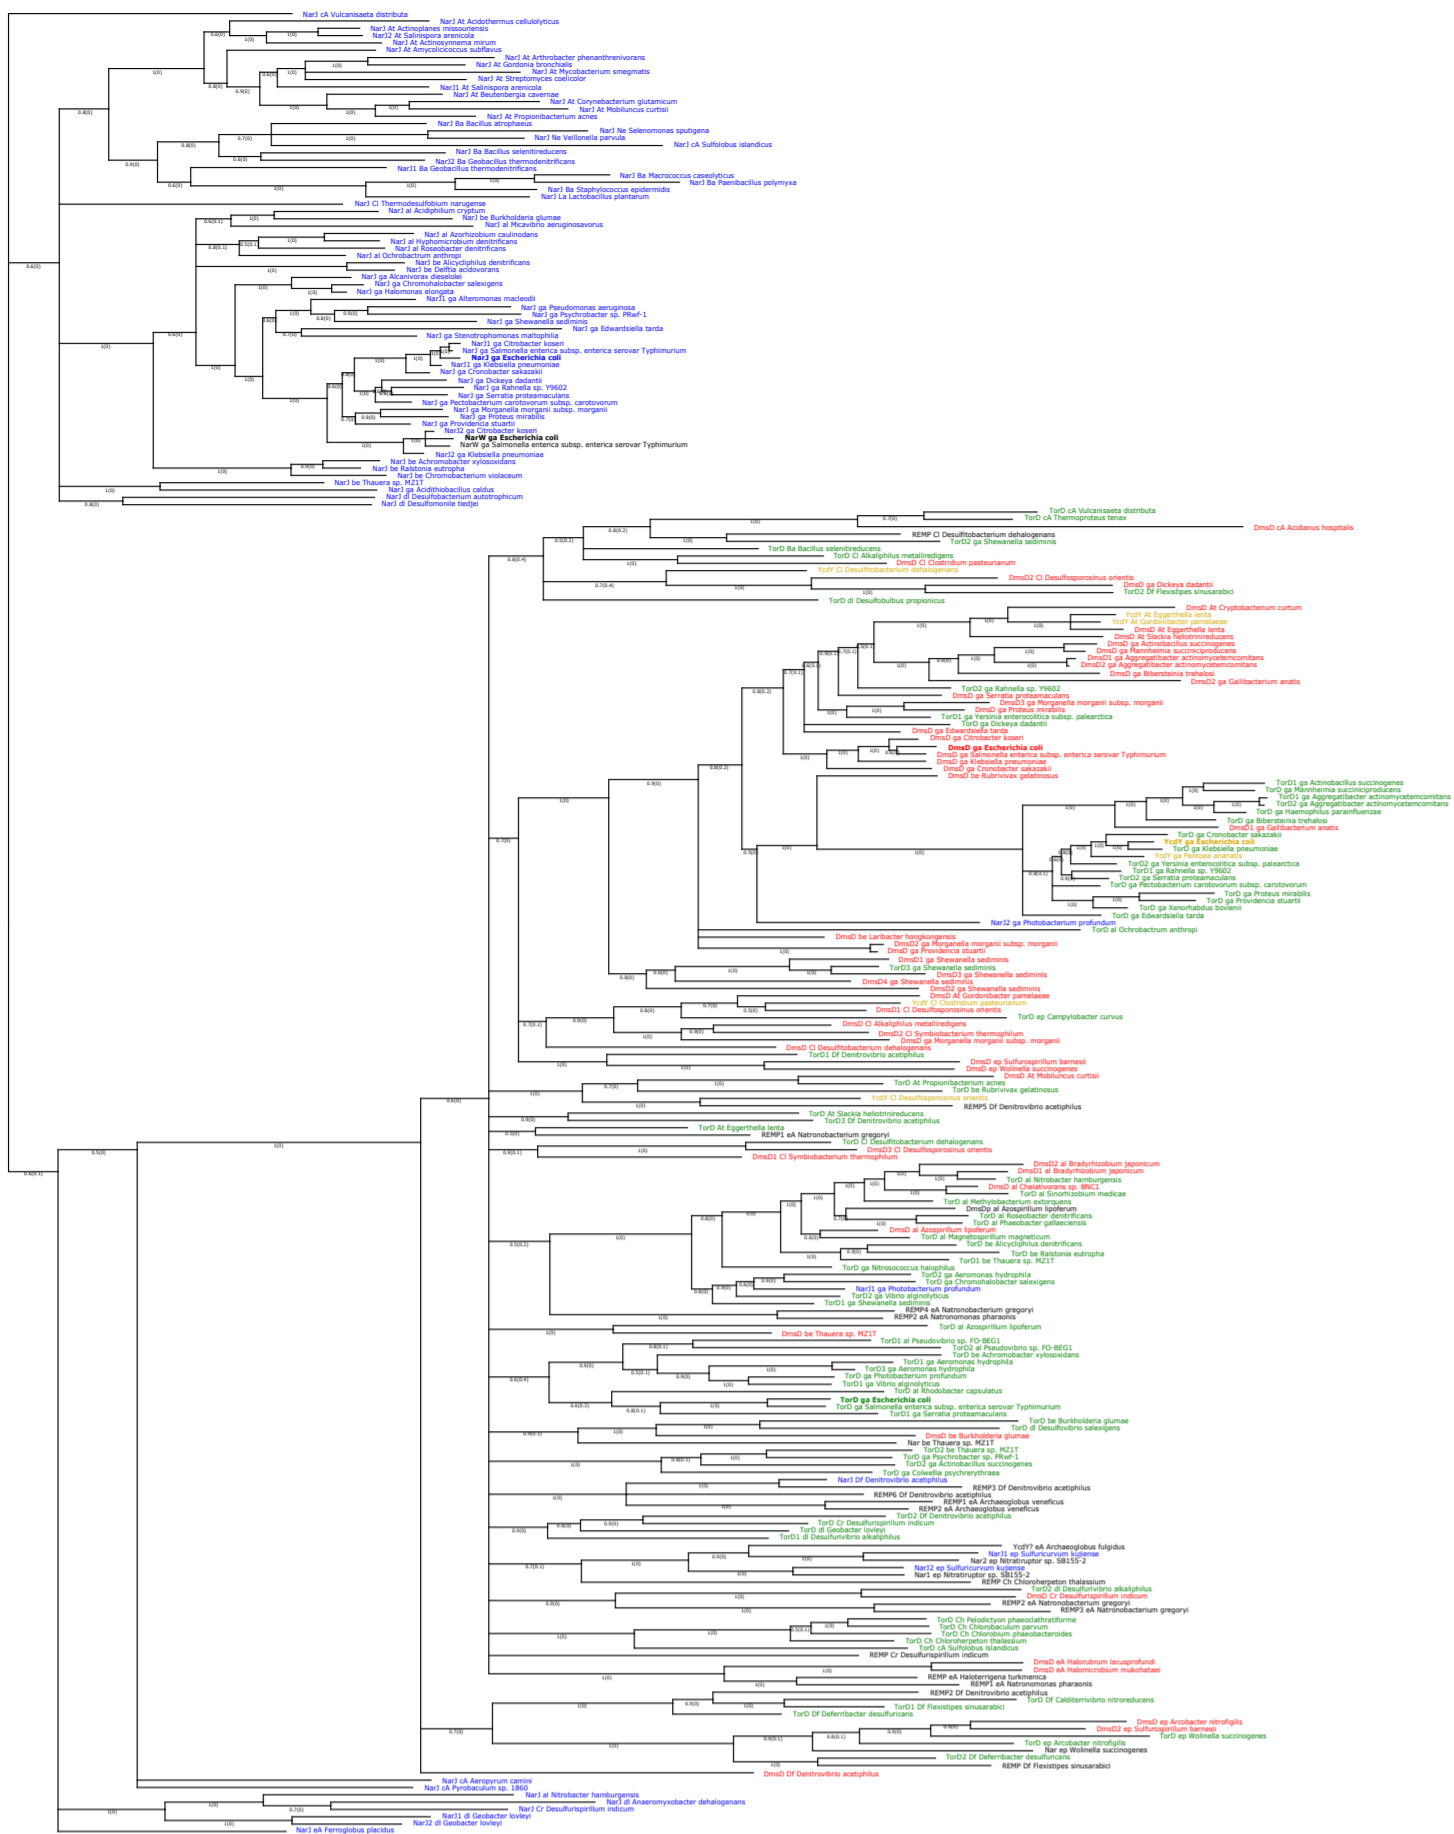

**NarJ-Bayes**

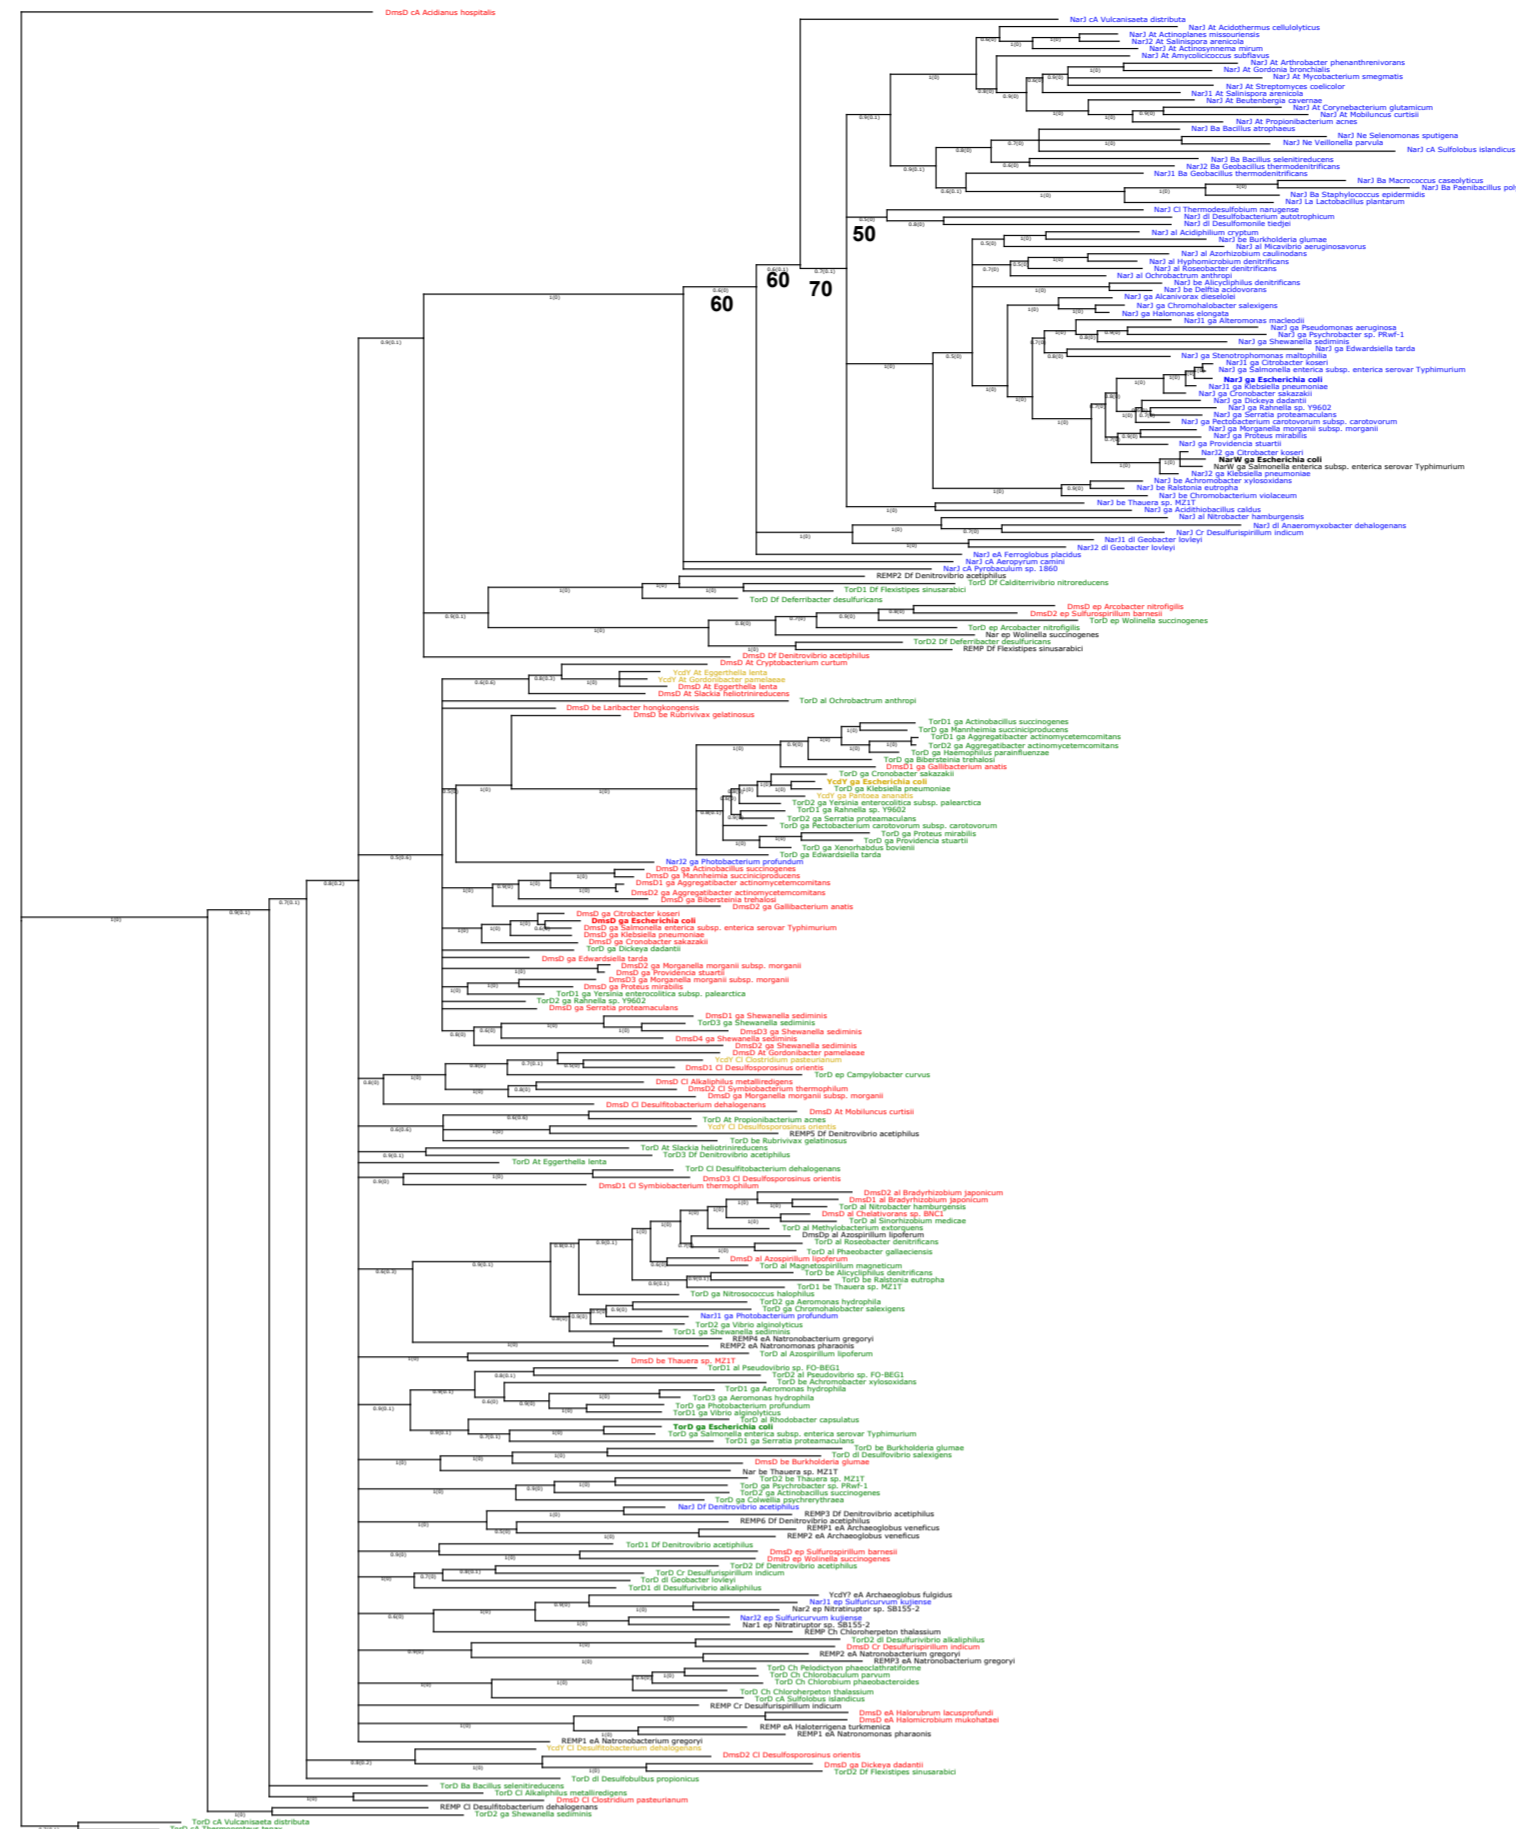

**DmsD-Bayes**

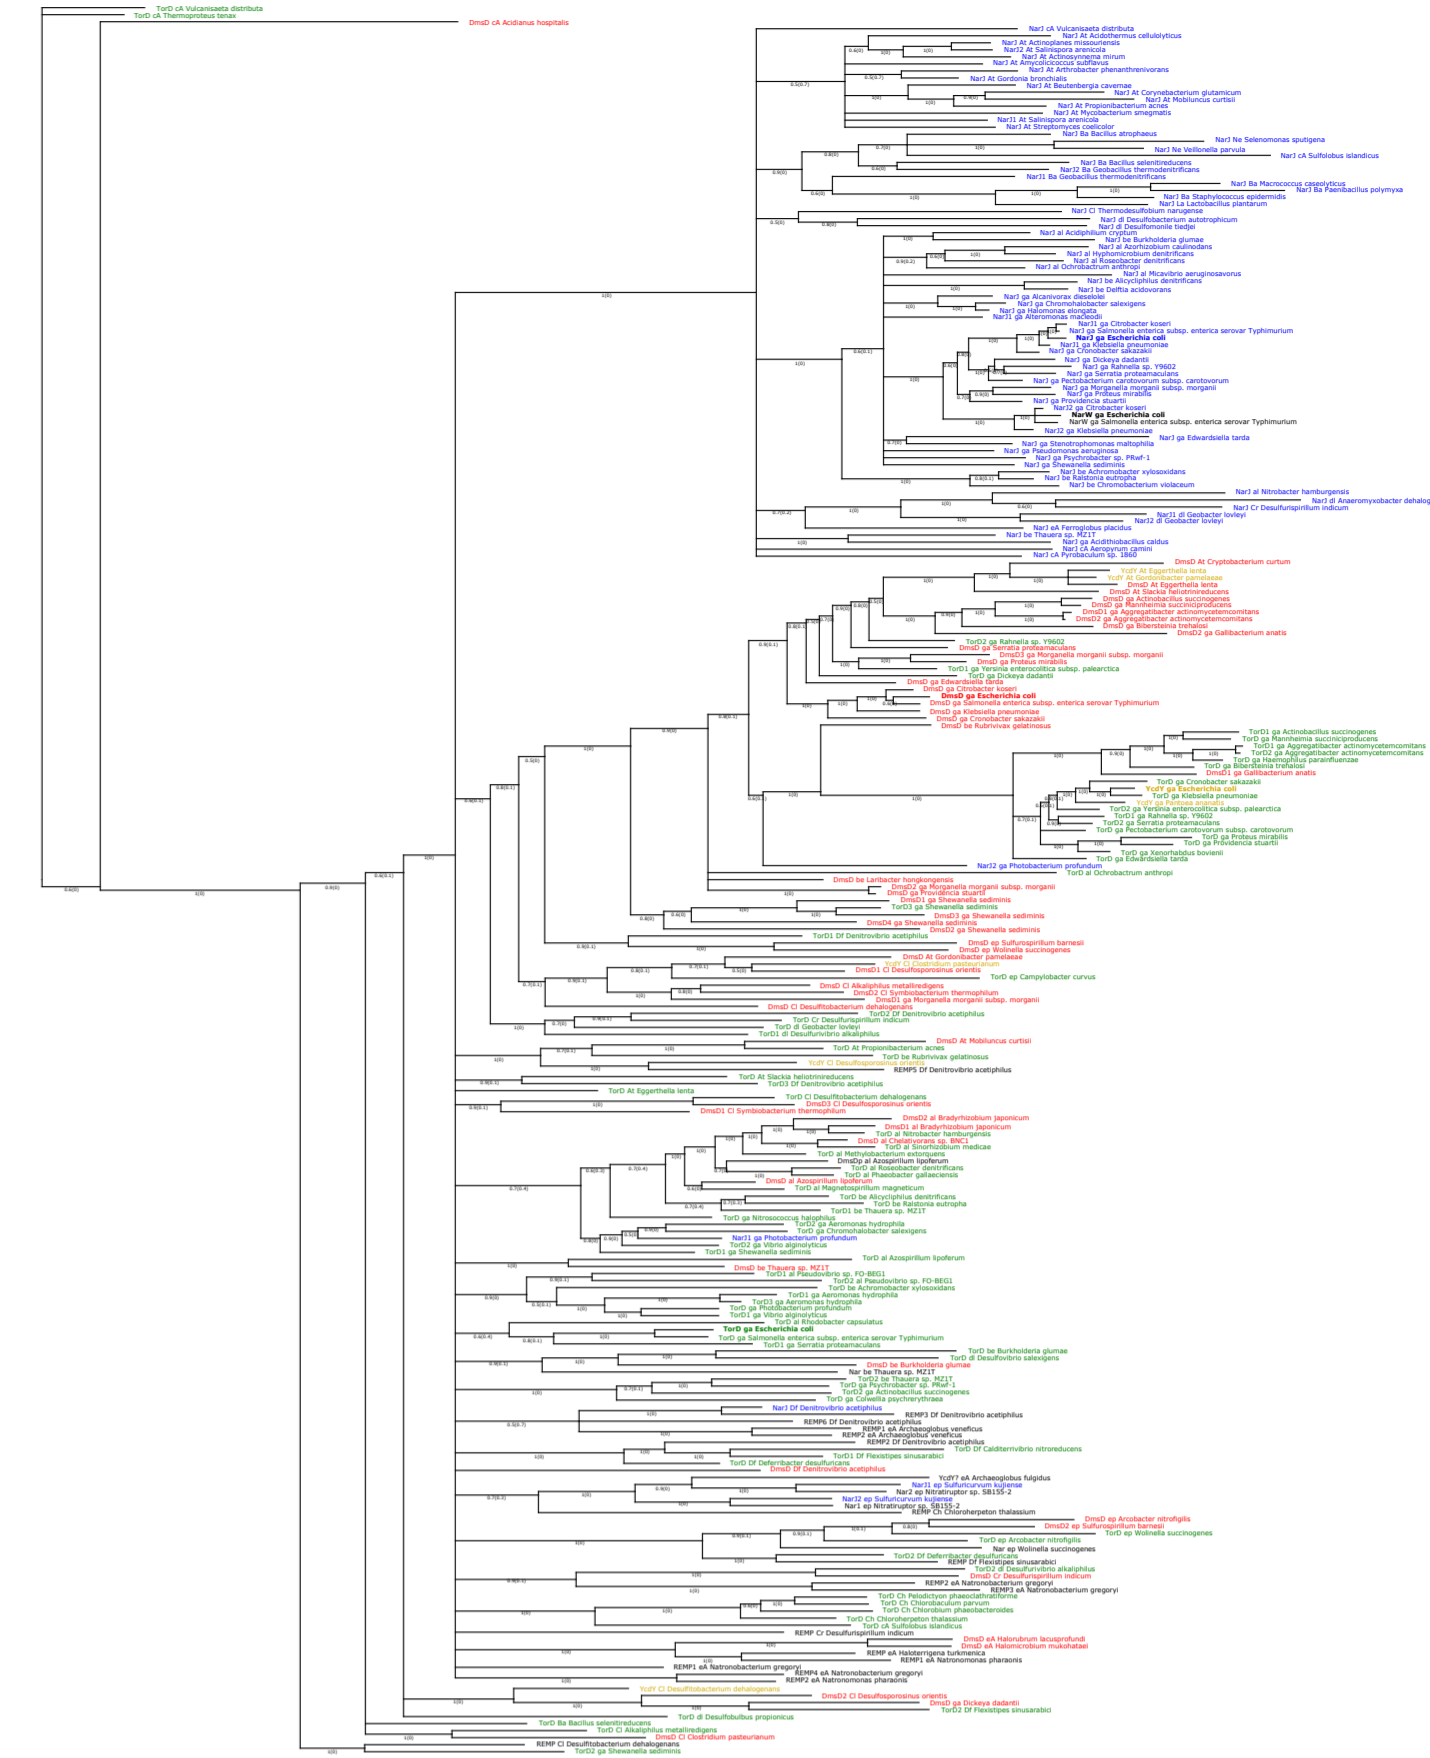

**TorD-Bayes**

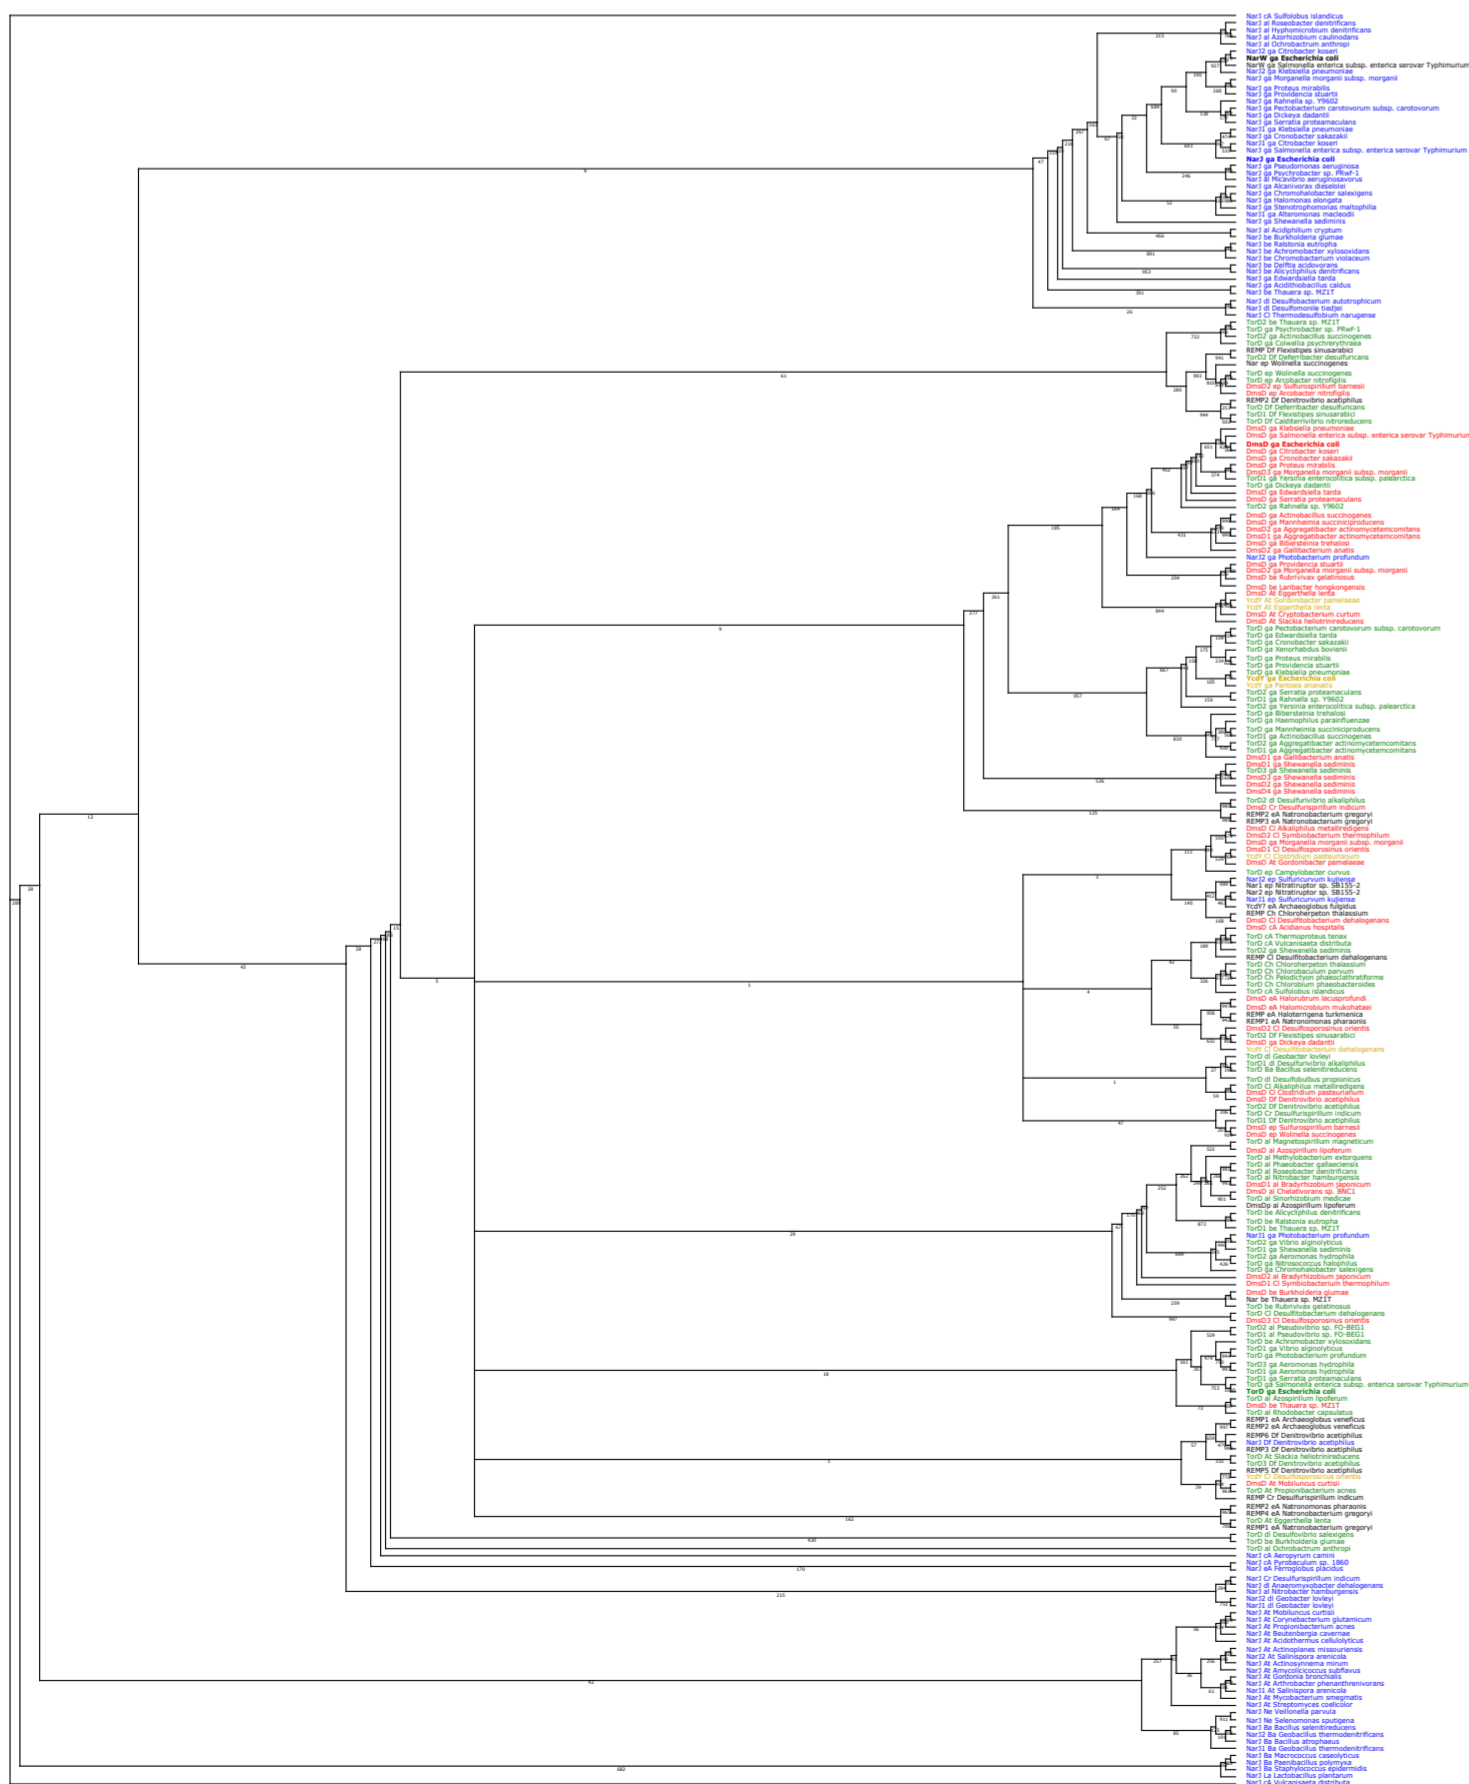

**NarJ-NJ**

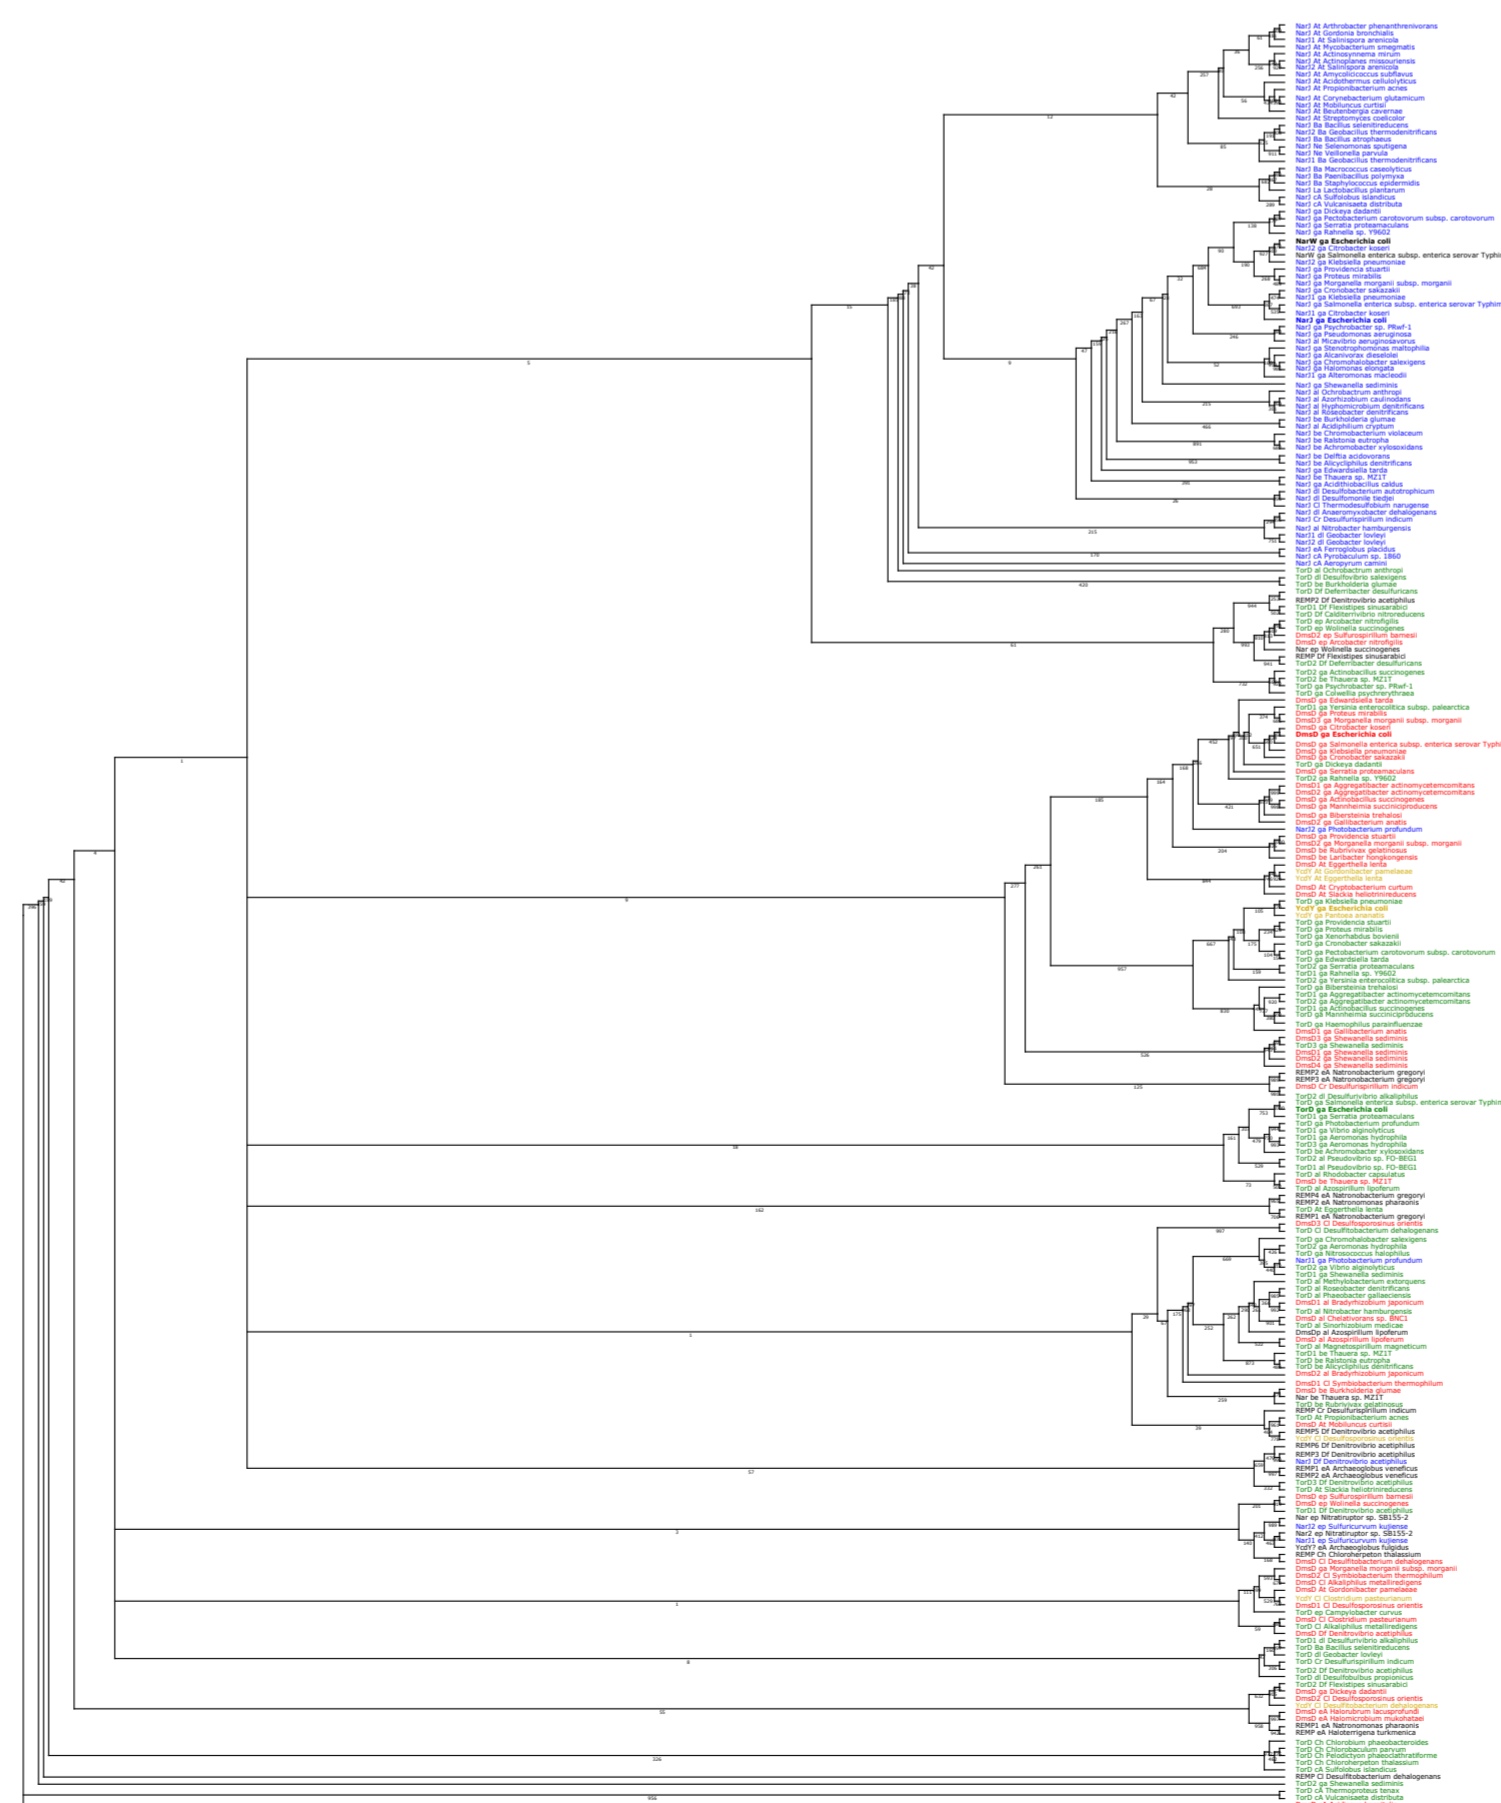

**DmsD-NJ**

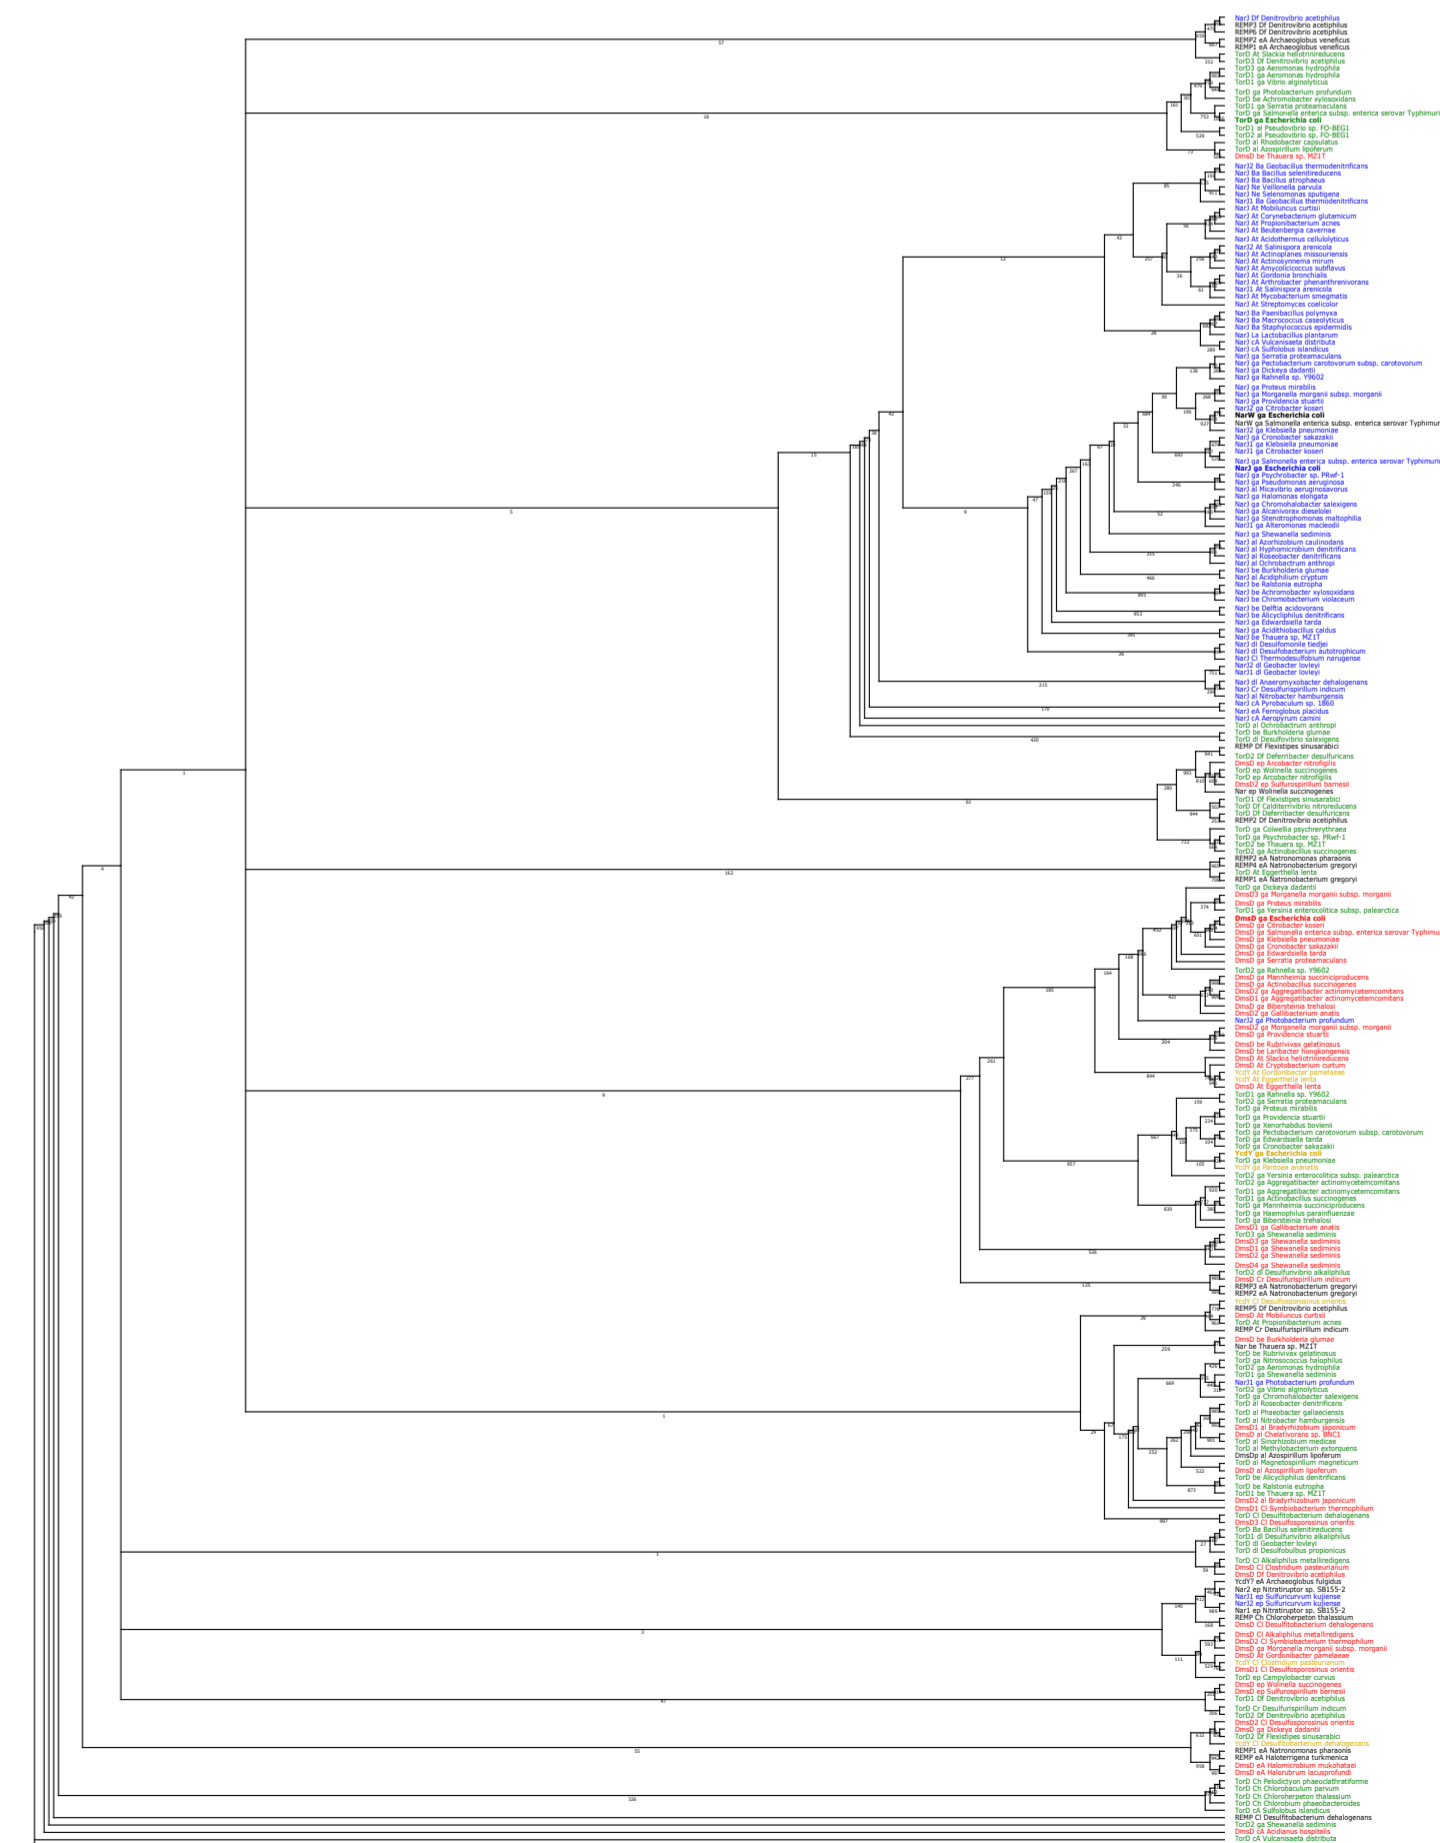

**TorD-NJ**
